# Supplementary material for: Ultrasound-Assisted Extraction of Phenolic Compounds from Celtuce (Lactuca sativa var. augustana) Leaves Using Natural Deep Eutectic Solvents (NADES): Process Optimization and Extraction Mechanism Research
Source: MDPI journal article supplement (doi:10.3390/molecules29102385), 2024-05-19
Supplement: s1 [file s1]

**Table S1 10 Phenolic compounds in Pr-LA extract identified by LC-MS method.**

| Peak no. | t <sub>R</sub> (min) | Proposed compound | Molecular formula                               | [M-H] <sup>-</sup> (m/z) | MS/MS (m/z)                            | ID based on |
|----------|----------------------|-------------------|-------------------------------------------------|--------------------------|----------------------------------------|-------------|
| 1        | 5.28                 | Gallic acid       | C <sub>7</sub> H <sub>6</sub> O <sub>5</sub>    | 169.0131                 | 169.0131                               | Standard    |
| 2        | 7.33                 | Chlorogenic acid  | C <sub>16</sub> H <sub>18</sub> O <sub>9</sub>  | 353.0867                 | 191.0553, 162.0233                     | Standard    |
| 3        | 8.38                 | Catechin          | C <sub>15</sub> H <sub>14</sub> O <sub>6</sub>  | 289.0706                 | 109.0284, 245.0819                     | [43]        |
| 4        | 8.69                 | Caffeic acid      | C <sub>9</sub> H <sub>8</sub> O <sub>4</sub>    | 179.0339                 | 135.0439                               | Standard    |
| 5        | 11.91                | Rutin             | C <sub>27</sub> H <sub>29</sub> O <sub>16</sub> | 608.1372                 | 609.1491, 300.0280, 271.0254, 609.1491 | Standard    |
| 6        | 13.88                | Isoquercitrin     | C <sub>21</sub> H <sub>20</sub> O <sub>12</sub> | 462.0793                 | 271.0252, 300.0280, 301.0265           | [45]        |
| 7        | 14.08                | Ferulic acid      | C <sub>10</sub> H <sub>10</sub> O <sub>4</sub>  | 193.0495                 | 149.0596, 178.0262                     | [47]        |
| 8        | 15.02                | Luteolin          | C <sub>15</sub> H <sub>10</sub> O <sub>6</sub>  | 285.0765                 | 133.0282, 151.0029                     | Standard    |
| 9        | 15.65                | Naringenin        | C <sub>15</sub> H <sub>12</sub> O <sub>5</sub>  | 271.0618                 | 119.0489, 151.0024                     | [49]        |
| 10       | 15.83                | Rhamnetin         | C <sub>16</sub> H <sub>12</sub> O <sub>7</sub>  | 315.0499                 | 193.0458, 165.0369.                    | [50]        |
