# Supplementary material for: Ultrasound-Assisted Extraction of Phenolic Compounds from Celtuce (Lactuca sativa var. augustana) Leaves Using Natural Deep Eutectic Solvents (NADES): Process Optimization and Extraction Mechanism Research
Source: MDPI journal article supplement (doi:10.3390/molecules29102385), 2024-05-19
Supplement: s1 [file s1]

**Table S2 Box-Behnken design and results for the UAE of TPC from CLs.**

| Run | Water<br>content, A<br>(%) | Extraction<br>time,<br>B (min) | Extraction<br>temperature,<br>C (°C) | L/S ratio,<br>D(mL/g) | Extraction<br>yield<br>(mg GAE/g<br>DW) |
|-----|----------------------------|--------------------------------|--------------------------------------|-----------------------|-----------------------------------------|
| 1   | 50                         | 40                             | 40                                   | 70                    | 19.7555                                 |
| 2   | 50                         | 40                             | 30                                   | 80                    | 18.2533                                 |
| 3   | 30                         | 30                             | 30                                   | 70                    | 18.0255                                 |
| 4   | 40                         | 30                             | 40                                   | 70                    | 23.7396                                 |
| 5   | 30                         | 40                             | 20                                   | 70                    | 22.9465                                 |
| 6   | 40                         | 50                             | 30                                   | 60                    | 19.9548                                 |
| 7   | 50                         | 50                             | 30                                   | 70                    | 16.6747                                 |
| 8   | 40                         | 40                             | 40                                   | 60                    | 19.6323                                 |
| 9   | 40                         | 40                             | 30                                   | 70                    | 24.2236                                 |
| 10  | 40                         | 30                             | 20                                   | 70                    | 18.7543                                 |
| 11  | 50                         | 40                             | 20                                   | 70                    | 15.5864                                 |
| 12  | 40                         | 50                             | 40                                   | 70                    | 20.5975                                 |
| 13  | 30                         | 40                             | 30                                   | 80                    | 21.3048                                 |
| 14  | 40                         | 40                             | 30                                   | 70                    | 23.4042                                 |
| 15  | 40                         | 30                             | 30                                   | 60                    | 18.5729                                 |
| 16  | 40                         | 50                             | 20                                   | 70                    | 23.1806                                 |
| 17  | 40                         | 50                             | 30                                   | 80                    | 22.3168                                 |
| 18  | 40                         | 40                             | 20                                   | 60                    | 22.0042                                 |
| 19  | 40                         | 40                             | 30                                   | 70                    | 26.0502                                 |
| 20  | 40                         | 40                             | 40                                   | 80                    | 24.0432                                 |
| 21  | 30                         | 40                             | 30                                   | 60                    | 20.0451                                 |
| 22  | 50                         | 30                             | 30                                   | 70                    | 16.9319                                 |
| 23  | 50                         | 40                             | 30                                   | 60                    | 14.4123                                 |

---

|    |    |    |    |    |         |
|----|----|----|----|----|---------|
| 24 | 40 | 40 | 30 | 70 | 24.4221 |
| 25 | 40 | 30 | 30 | 80 | 22.3673 |
| 26 | 40 | 40 | 20 | 80 | 22.669  |
| 27 | 30 | 50 | 30 | 70 | 19.5373 |
| 28 | 40 | 40 | 30 | 70 | 24.2236 |
| 29 | 30 | 40 | 40 | 70 | 18.5637 |

---
