# Supplementary material for: Ultrasound-Assisted Extraction of Phenolic Compounds from Celtuce (Lactuca sativa var. augustana) Leaves Using Natural Deep Eutectic Solvents (NADES): Process Optimization and Extraction Mechanism Research
Source: MDPI journal article supplement (doi:10.3390/molecules29102385), 2024-05-19
Supplement: s1 [file s1]

**Table S3 Kinetic parameters of the second order kinetic model for extraction.**

| Process       | Cs (mg·g <sup>-1</sup> ) | k (g·min <sup>-1</sup> mg <sup>-1</sup> ) | R <sup>2</sup> |
|---------------|--------------------------|-------------------------------------------|----------------|
| Water         | 8.50991                  | 0.02536                                   | 0.99022        |
| Ethanol (50%) | 15.6814                  | 0.02697                                   | 0.99682        |
| Pr-LA         | 24.3665                  | 0.01048                                   | 0.99644        |
