# Supplementary figures and images for: Ultrasound-Assisted Extraction of Phenolic Compounds from Celtuce (Lactuca sativa var. augustana) Leaves Using Natural Deep Eutectic Solvents (NADES): Process Optimization and Extraction Mechanism Research
Source: MDPI journal article supplement (doi:10.3390/molecules29102385), 2024-05-19

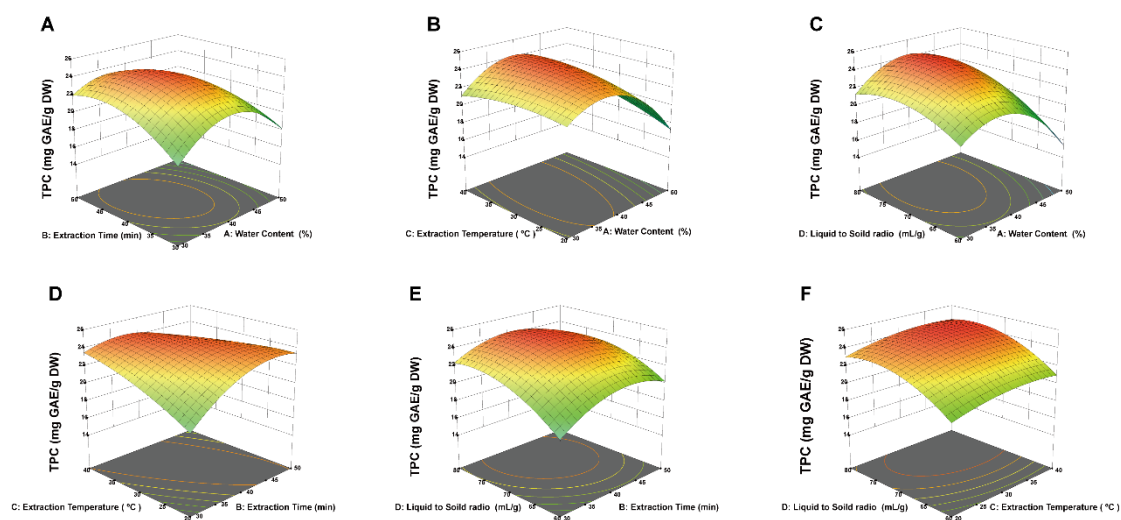

**Figure S2 Interactive effects of independent variables on TPC in extracted CLs.**

Supplement: s1 [file s1]

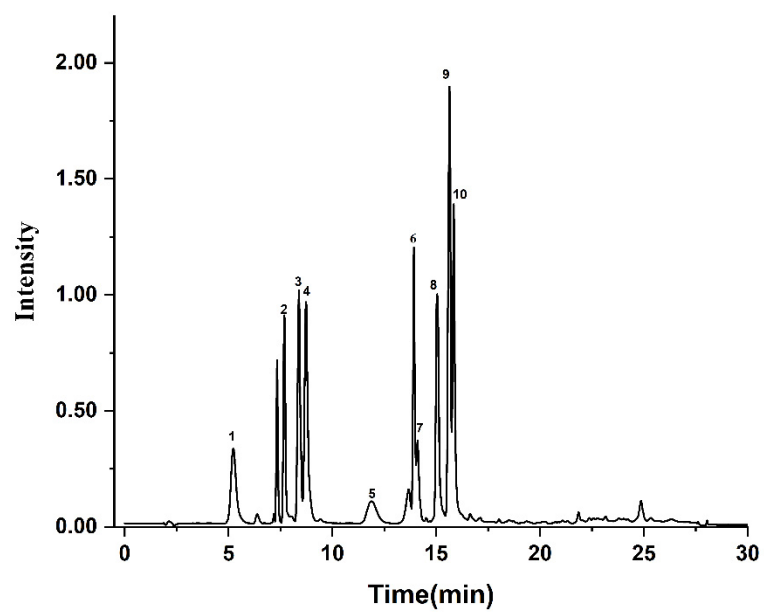

**Figure S1 LC-MS total ion chromatogram of Pr-LA extract in negative ion mode.**

Supplement: s1 [file s1]
